# Supplementary material
Source: Springer Nature journal article supplement (https://www.springermedizin.de/resource/supplementary/12889_2013_6132_MOESM1_ESM.pdf/9494382)
Supplement: MOESM1 [file 9494382]

Approval from the UMMC Ethics Committee was obtained

Registration Number (R/N) of all T2DM patients (fulfilled ICD-10 of E11) identified from January 2009 to December 2011 were identified using MMUS(*514 patients*)

Patients' medical records were successfully retrieved from the Medical Records Office.  
(*404 patients*)

Failed to obtain records  
(*110 patients*)

All inclusion criteria fulfilled?

No

Excluded from study  
(*196 patients*)

Yes

Final study population  
(*208 patients*)

Data Collection

Data Analysis
